# Supplementary material for: Cross-correlated humidity-dependent structural evolution of Nafion thin films confined on a platinum substrate
Source: Royal Society of Chemistry journal article supplement (doi:10.1039/c9sm01731c), 2019-12-16
Supplement: c9sm01731c1.pdf [file c9sm01731c1.pdf]

## Supplementary Information

### **Cross-Correlated Humidity Dependent Structural Evolution of Nafion Thin Film Confined on Platinum Substrate**

Udit N. Shrivastava<sup>a</sup>, Kota Suetsugu<sup>b</sup>, Shusaku Nagano<sup>c</sup>, Helmut Fritzsche<sup>d</sup>, Yuki Nagao<sup>e</sup>, Kunal  
Karan<sup>a,\*</sup>

a. Department of Chemical and Petroleum Engineering, University of Calgary, Calgary, AB, Canada

b. Department of Molecular and Macromolecular Chemistry, Graduate School of Engineering, Nagoya University,  
Furo-cho, Chikusa, Nagoya 464-8603, Japan.

c. Nagoya University Venture Business Laboratory, Nagoya University, Furo-cho, Chikusa, Nagoya 464-8603, Japan

d. Canadian Nuclear Laboratories, Chalk River ON, Canada

e. School of Materials Science, Japan Advanced Institute of Science and Technology, 1-1 Asahidai, Nomi, Ishikawa  
923-1292, Japan.

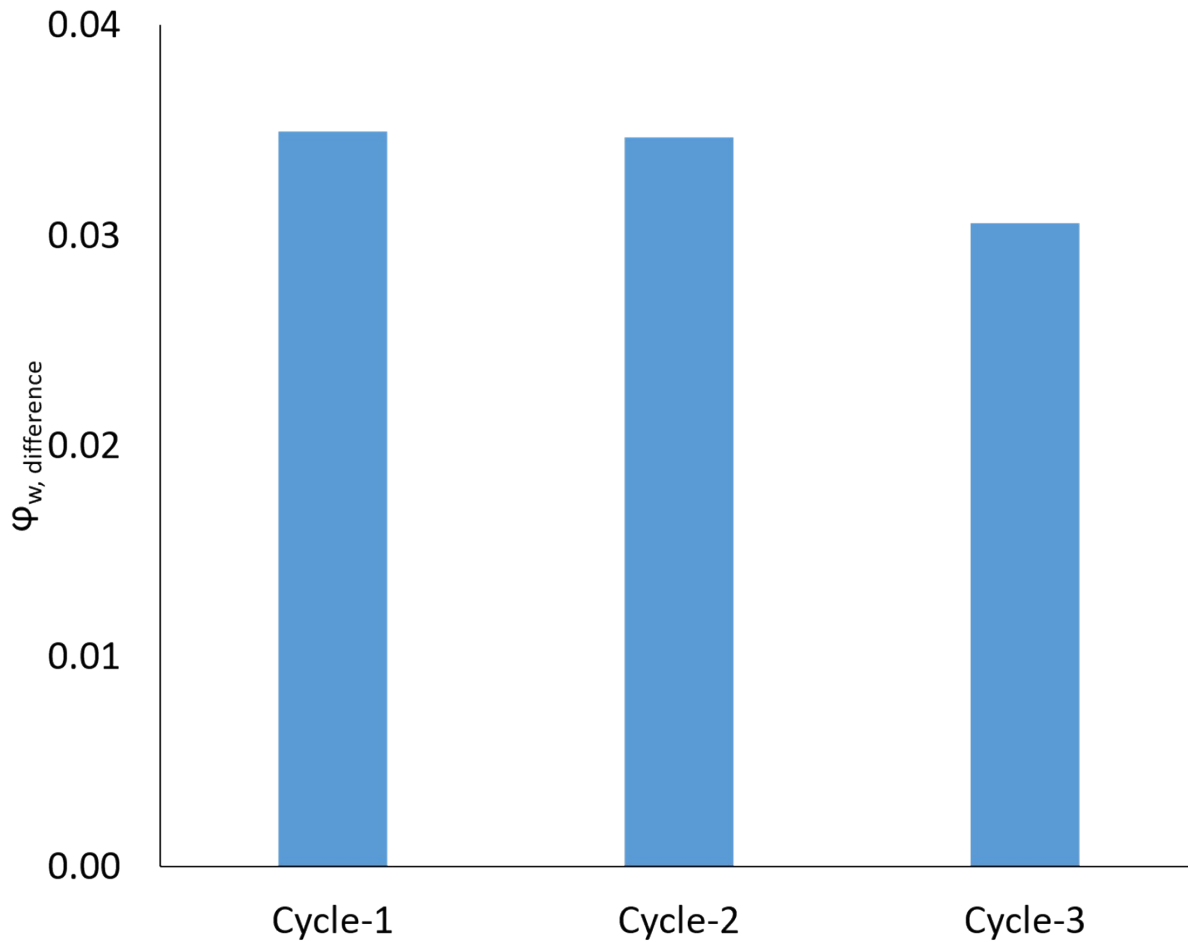

**Figure S1. The difference in volume fraction estimated from ellipsometry and QCM at 25 °C for a sample cycled three times between 0% and 90% RH. Note mass of water on the bare Pt is deducted from QCM measurement.**

**a) Volume fraction estimation from direct mass uptake measured by QCM**

$$\Delta m = \Delta F / CF \quad (1)$$

$$L_w = \Delta m / \rho_w \quad (2)$$

$$\Phi_w = L_w / L \quad (3)$$

Where,  $\Delta m$  is the water mass uptake measured from QCM in ng/cm<sup>2</sup>,  $\Delta F$  the frequency change upon water uptake in Hz,  $CF$  the conversion factor 56 Hz/ng,  $L_w$  and  $L$  the

thickness of water and dry ionomer layer in nm,  $\rho_w$  the density of water in g/cm<sup>3</sup>, and  $\phi_w$  is the water volume fraction.

**b) Volume fraction estimation from measurement of unidirectional film expansion in Z direction (Ellipsometry and NR).**

$$\Phi_w = \Delta L / L \quad (4)$$

where,  $\Delta L$  is change in thickness of the dry film in nm upon water uptake.

**c) Volume fraction estimation from SLD measured by NR.**

$$\varphi_w(z) = \frac{(SLD_{ion} - SLD_{ion+w}(z))}{(SLD_{ion} - SLD_w)} \quad (5)$$

$$\varphi_w = \int \varphi_w(z) \cdot dz / L \quad (6)$$

where  $SLD_{ion}$  is the SLD of the dry ionomer,  $SLD_{ion+w}$  is the SLD of water containing ionomer,  $SLD_w$  is the SLD of water, and L is thickness of ionomer

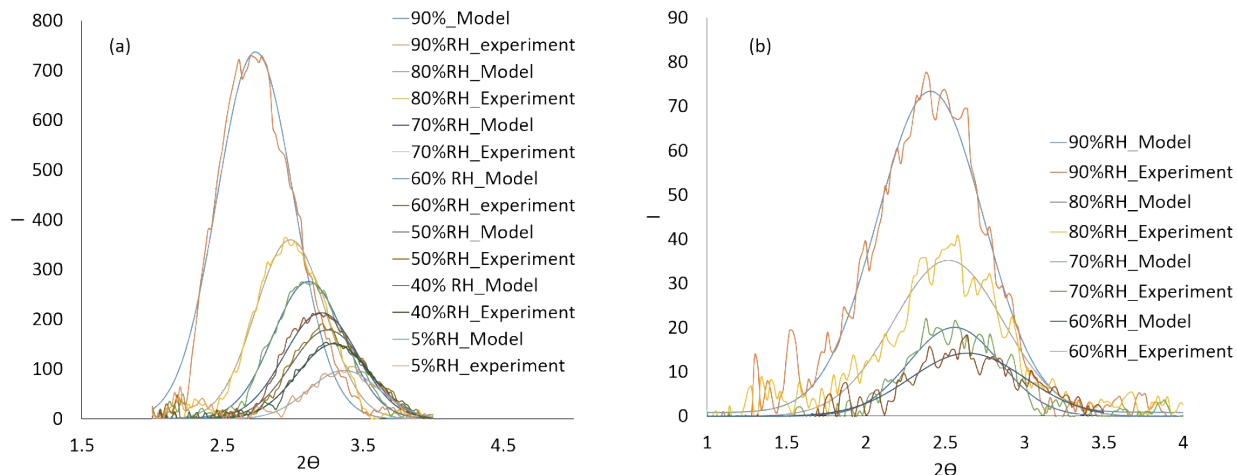

**Figure S2. Fitting of the GISAXS peaks using a Gaussian curve for a) Out-of-plane intensity b) In-plane intensity**

**d) Fitting of Reflectivity data using different models**

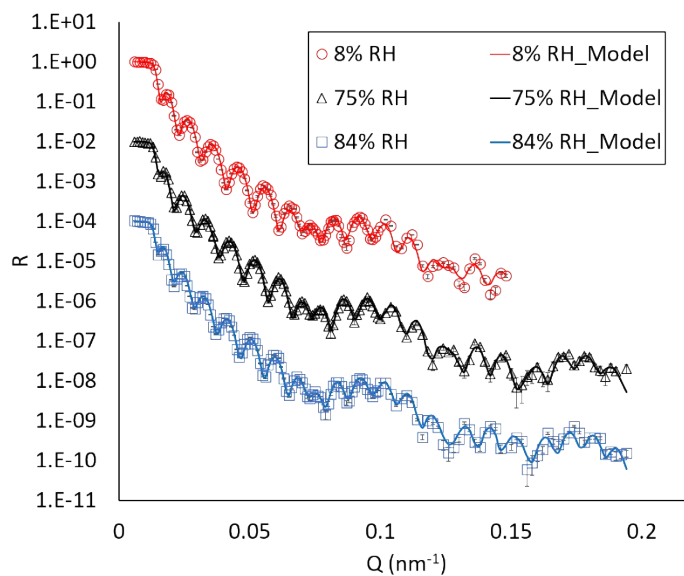

**Figure S3. Reflectivity data obtained for water containing 55 nm EW1100 film on Pt in 8% RH, 75% RH, and 84% RH at 25 °C fitted with a four-layer model.**

**Table S1: Comparisons of Figure of Merits (FOM) for data fitted with different # of layers**

| <b>RH</b> | <b>Layers</b> | <b>FOM</b>   | <b>Chi2</b>  | <b>BIC</b>    |
|-----------|---------------|--------------|--------------|---------------|
| 8%        | 1             | 0.07         | 5.62         | 807.18        |
| 75%       | 1             | 0.09         | 54.98        | 7372          |
|           | 2             | 0.079        | 46.85        | 6165          |
|           | 3             | 0.074        | 37.06        | 4796          |
|           | <b>4</b>      | <b>0.065</b> | <b>13.83</b> | <b>1819</b>   |
|           | 5             | 0.064        |              |               |
| 84%       | 1             | 0.095        | 24.9         | 3371          |
|           | 2             | 0.085        | 21.81        | 2910          |
|           | 3             | 0.08         | 18.69        | 2463          |
|           | <b>4</b>      | <b>0.07</b>  | <b>10.54</b> | <b>1411.5</b> |
|           | 5             | 0.07         |              |               |

Where 
$$FOM = \frac{1}{n-p} \sum_{n=1}^n |\log(R) - \log(S)|$$

Where 
$$chi2 = \frac{1}{n-p} \sum_{n=1}^n \left( \frac{R-S}{E} \right)^2$$
 and  $BIC = (n-p).chi2 + p \ln(n)$

Where

n is the number of data points, p the number of parameters, R the experimental reflectivity, and S is the simulated reflectivity, and E is experimental error. BIC is Bayesian information criterion.

FOM is the figure of merit indicates the goodness of the fit.

4-layer model is chosen to represent the structure of water contained ionomer thin film because compare to 3-layer model FOM change is more than 10%. We find that adding another layer doesn't change FOM much ( $< 10\%$ ) therefore 4-layer model is most suitable.
